# Supplementary material
Source: PubMed Central journal article supplement (PMC3141093)
Supplement: NIHMS308651-supplement-1_si_001.pdf [file NIHMS308651-supplement-1_si_001.pdf]

Synthesis of Mercapto-(+)-methamphetamine Haptens and Their Use for  
Obtaining Improved Epitope Density on (+)-Methamphetamine  
Conjugate Vaccines

*F. Ivy Carroll,<sup>\*,†</sup> Bruce E. Blough,<sup>†</sup> Ramakrishna R. Pidaparathi,<sup>†</sup> Philip Abraham,<sup>†</sup> Paul K. Gong,<sup>†</sup> Liu Deng,<sup>†</sup> Xiaodong Huang,<sup>†</sup> Melinda Gunnell,<sup>‡</sup> Jackson O. Lay, Jr.,<sup>§</sup> Eric C. Peterson,<sup>‡</sup> and S. Michael Owens<sup>‡</sup>*

<sup>†</sup>Center for Organic and Medicinal Chemistry, Research Triangle Institute, P. O. Box 12194, Research Triangle Park, NC 27709, <sup>‡</sup>Department of Pharmacology and Toxicology, College of Medicine, University of Arkansas for Medical Sciences, Little Rock, AR 72205, <sup>§</sup>Department of Chemistry and Biochemistry, University of Arkansas, Fayetteville, AR 72701

## SUPPORTING INFORMATION

### Table of Contents

|                        |    |
|------------------------|----|
| Analysis Appendix..... | S2 |
|------------------------|----|

---

\* To whom correspondence should be addressed. Phone: 919 541-6679. Fax: 919 541-8868. E-mail: [fic@rti.org](mailto:fic@rti.org).

## Analysis Appendix

| Compound  | Formula                            | Calculated |      |      | Found |      |      |
|-----------|------------------------------------|------------|------|------|-------|------|------|
|           |                                    | C          | H    | N    | C     | H    | N    |
| <b>6</b>  | $C_{11}H_{18}ClNO$                 | 61.25      | 8.41 |      | 61.04 | 8.50 |      |
| <b>9</b>  | $C_{22}H_{35}NO_5$                 | 67.15      | 8.96 | 3.56 | 67.31 | 9.13 | 3.61 |
| <b>10</b> | $C_{21}H_{33}NO_5 \cdot 0.75 H_2O$ | 64.18      | 8.85 | 3.56 | 64.01 | 8.67 | 3.52 |
